# Supplementary material for: Best Estimate of the Planetary Boundary Layer Height from Multiple Remote Sensing Measurements
Source: Copernicus journal article supplement (doi:10.5194/egusphere-2024-3959), 2025-02-14
Supplement: Supplementary file 1 [file egusphere-2024-3959-supplement.pdf]

Supplement of

## Best Estimate of the Planetary Boundary Layer Height from Multiple Remote Sensing Measurements

Damao Zhang<sup>1</sup>, Jennifer Comstock<sup>1</sup>, Chitra Sivaraman<sup>1</sup>, Kefei Mo<sup>1</sup>, Raghavendra Krishnamurthy<sup>1</sup>, Tianning Su<sup>2</sup>, Zhanqing Li<sup>3</sup>, Natalia Roldán Henao<sup>3</sup>

<sup>1</sup>Pacific Northwest National Laboratory, Richland, Washington, USA

<sup>2</sup>Lawrence Livermore National Laboratory, Livermore, CA, USA

<sup>3</sup>Department of Atmospheric and Oceanic Sciences, University of Maryland, College Park, College Park, MD, USA

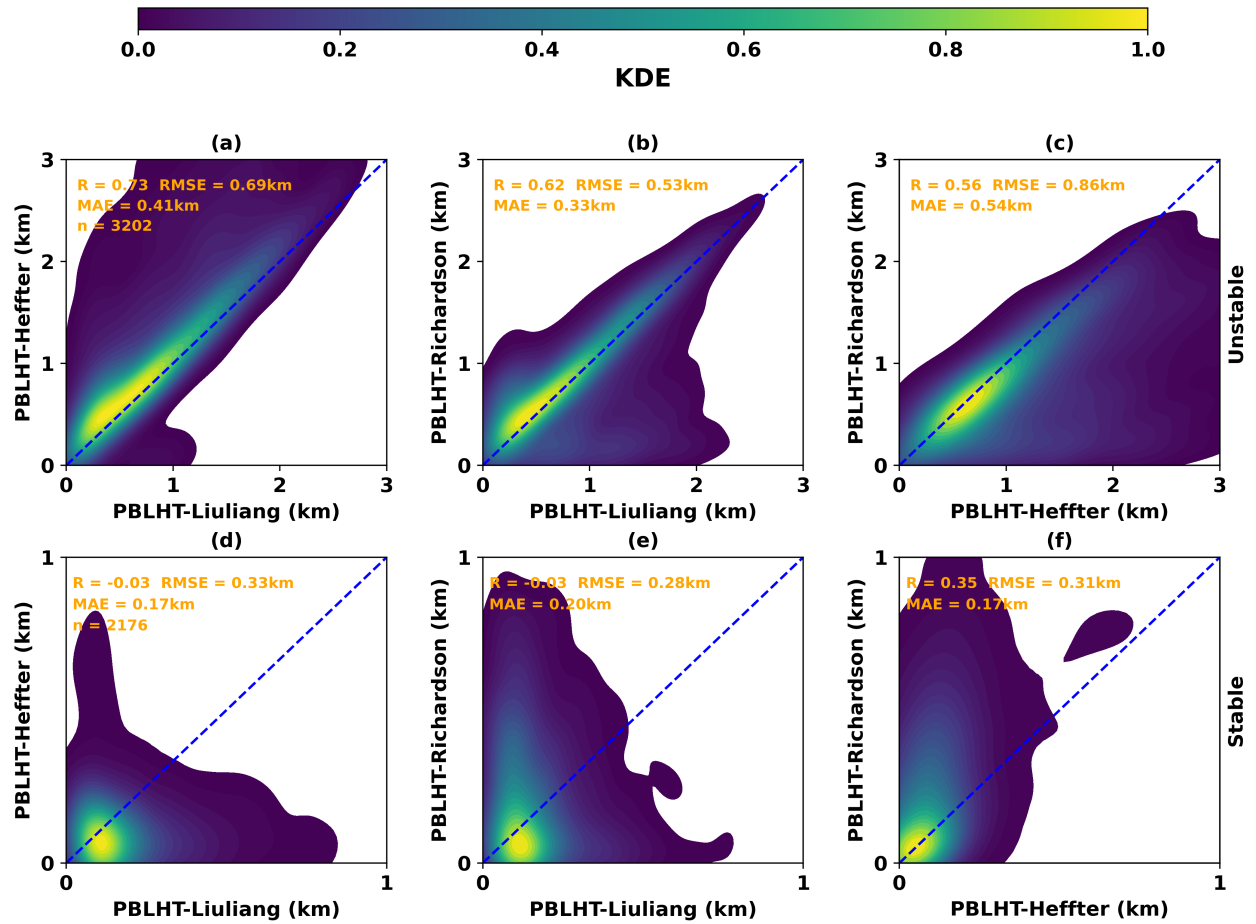

**Figure S1.** Intercomparisons of PBLHT estimates from the three methods in the PBLHT-SONDE VAP using kernel distribution estimate (KDE) under unstable (a-c) and stable (d-f) PBL conditions.  $R$  is the correlation coefficient.  $RMSE$  is the root mean square error.  $MAE$  is the mean absolute error.  $n$  is the number of samples. Since the two PBLHT estimates from the bulk Richardson method use the same approach but with different  $Ri_c$  values, only the estimate with  $Ri_c$  value of 0.25 is used.

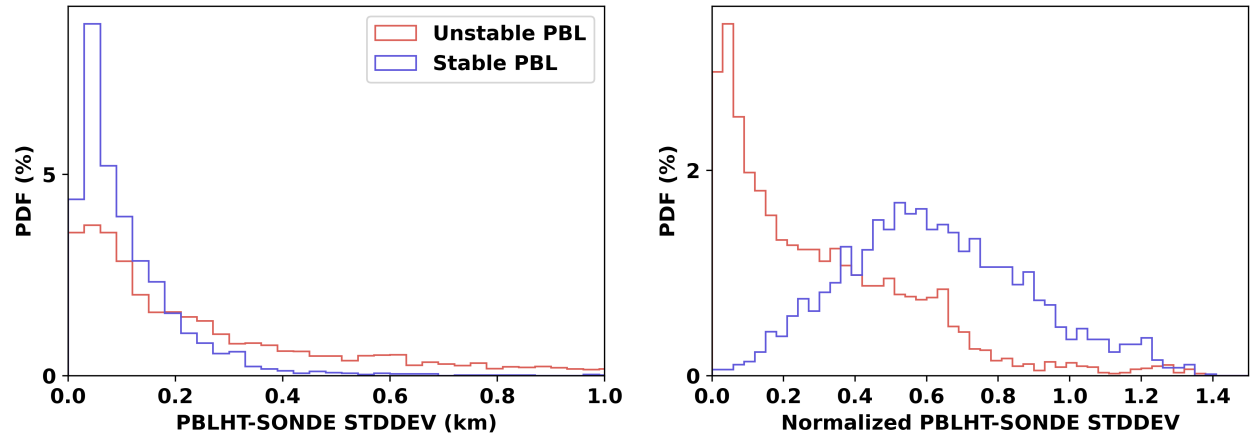

**Figure S2.** Probability Distribution Functions (PDFs) of (a) standard deviation and (b) normalized standard deviation with their mean values among the PBLHT estimates from the three methods in the PBLHT-SONDE VAP under both unstable and stable PBL conditions.

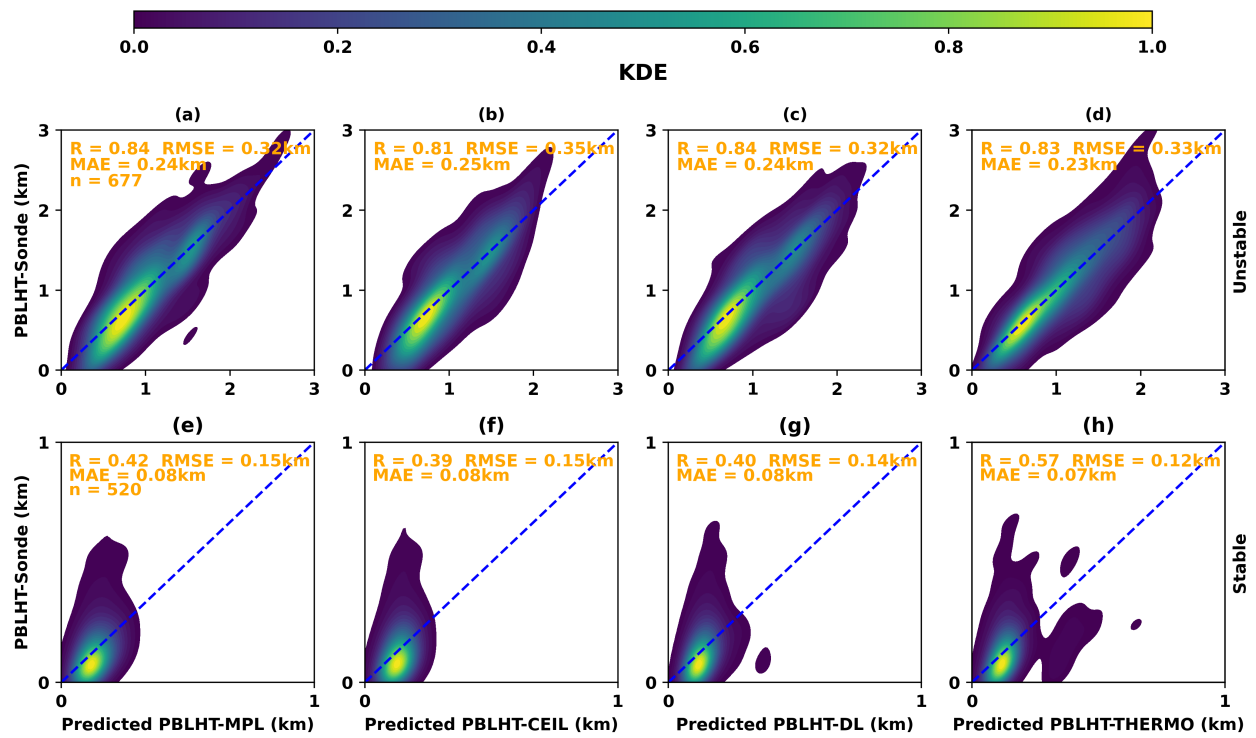

**Figure S3.** Similar as Figure S1, but for comparisons of predicted PBLHT using a Random Forest Regressor model based on individual remote sensing PBLHT estimates of: (a and e) PBLHT-MPL; (b and f) PBLHT-CEIL; (c and g) PBLHT-DL; and (d and h) PBLHT-THERMO under unstable and stable PBLH conditions.

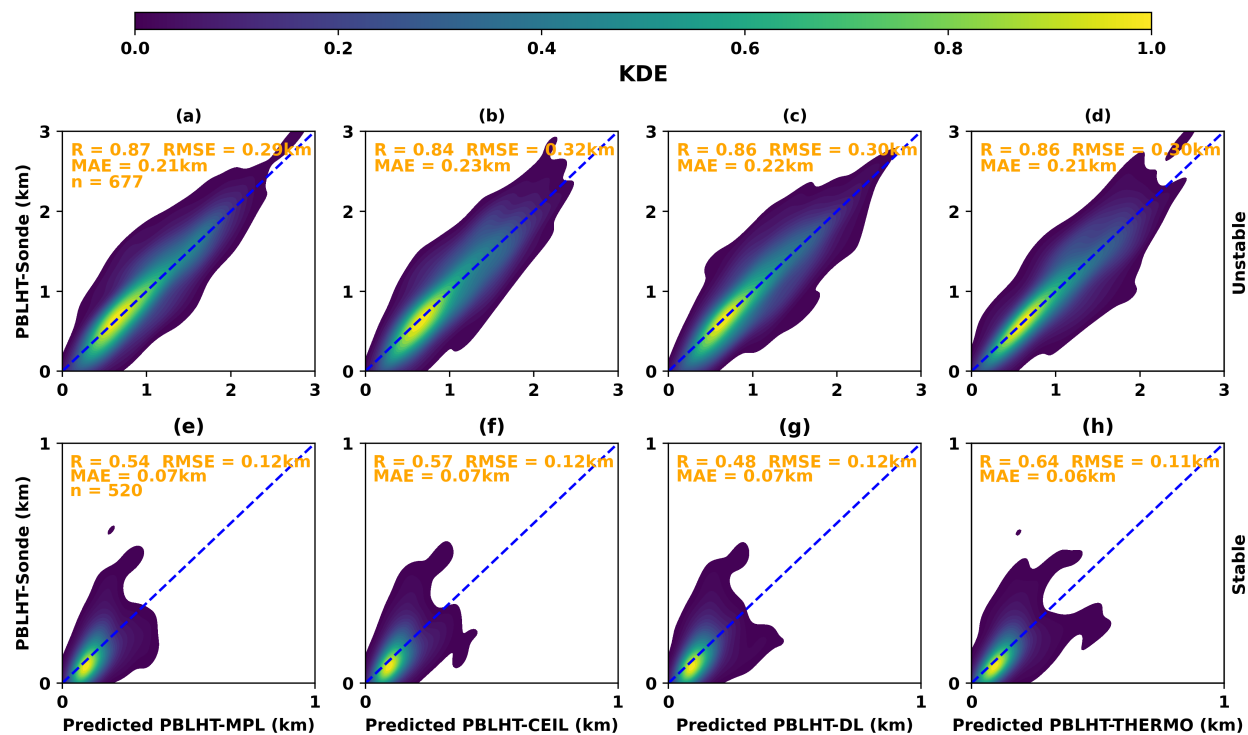

**Figure S4.** Similar as Figure S3, but for using the LightGBM model.

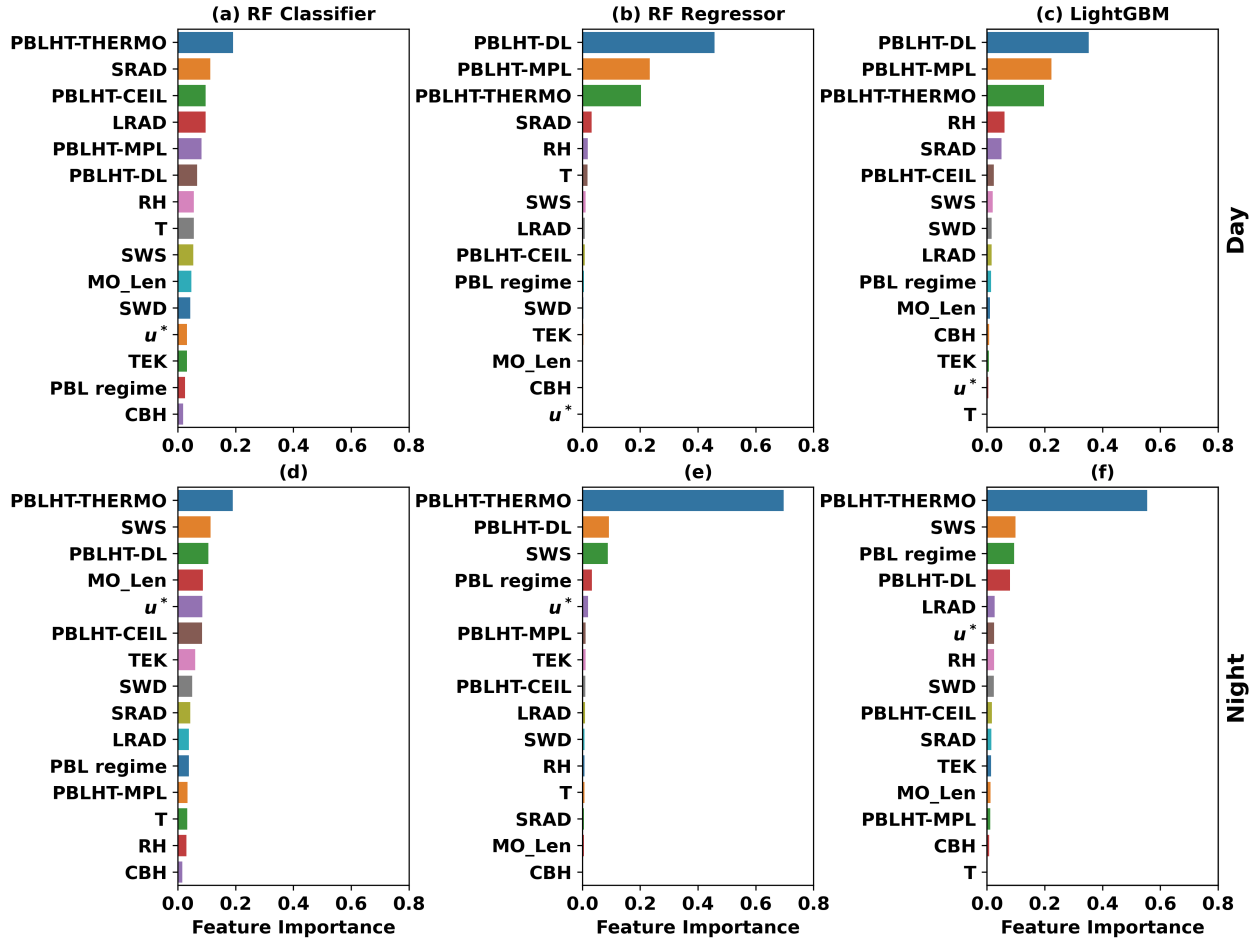

**Figure S5.** Feature importance for the three ML models at the training stage: a) and d) RF Classifier; b) and e) RF Regressor; c) and f) LightGBM during day (upper panels) and night (bottom panels) time periods. Feature importance scores are normalized so that they sum up to 1.

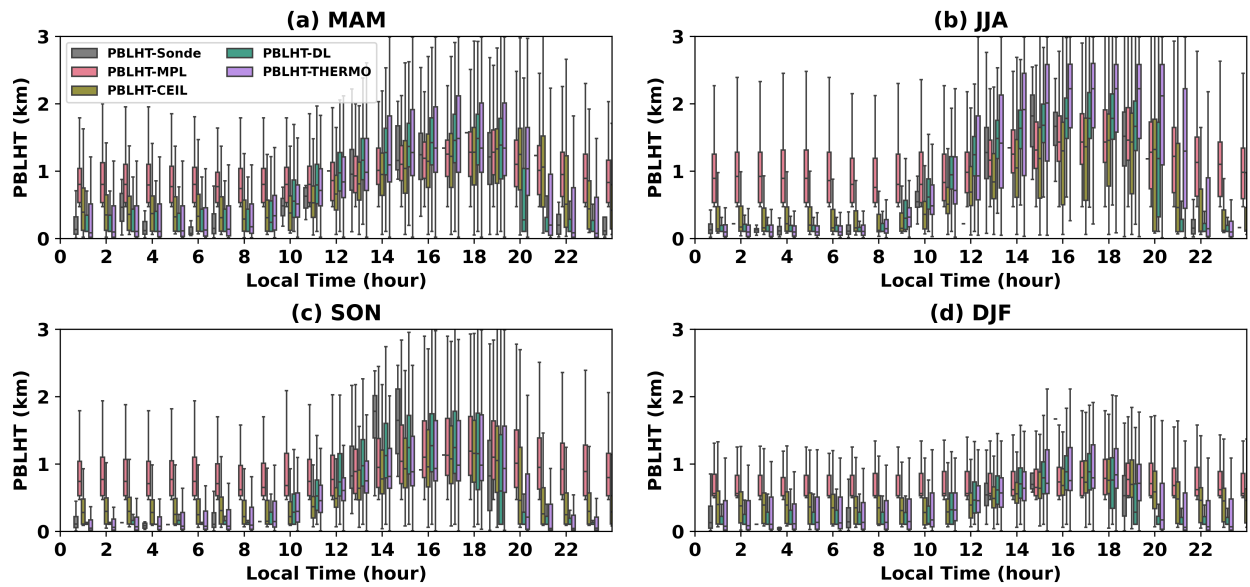

**Figure S6.** PBLHT diurnal cycles and their seasonal variations from PBLHT-MPL, PBLHT-CEIL, PBLHT-DL, PBLHT-THERMOD, and PBLHT-Sonde at the ARM SGP observatory. MAM (March-April-May) represents the Spring season, JJA (Jun-July-August) for Summer, SON (September-October-November) for Fall, and DJF (December-January-February) for Winter. Horizontal bars, boxes and whiskers represent the median, interquartile range and range of the data.

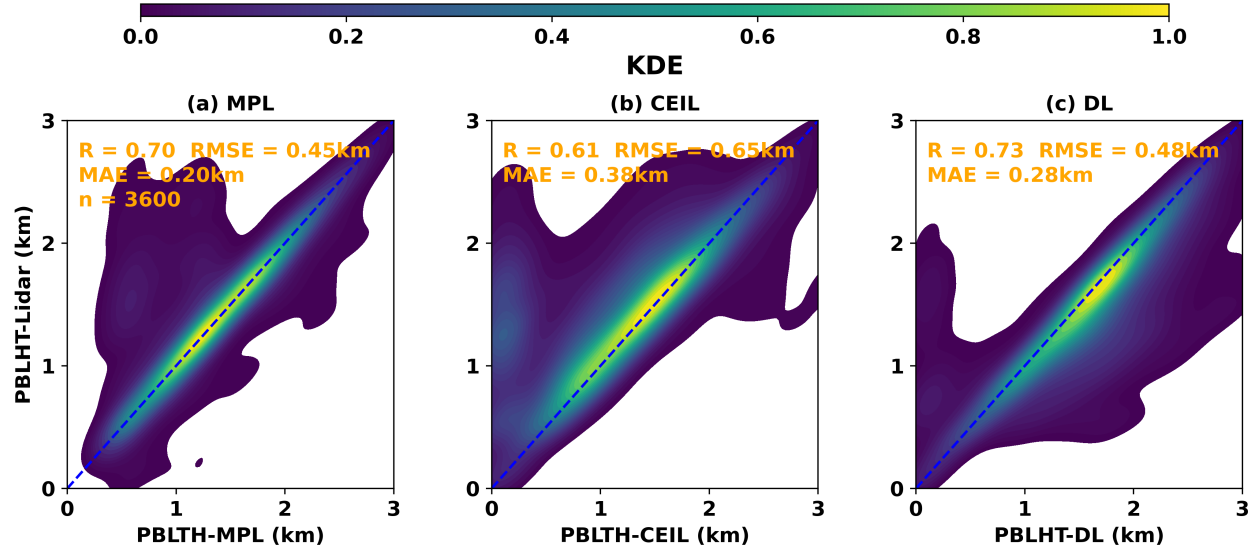

**Figure S7.** Similar as Figure S1, but for comparisons of (a) PBLHT-MPL; (b) PBLHT-CEIL; and (c) PBLHT-DL against PBLHT-Lidar under afternoon convective PBL conditions between 14:00 and 18:00 local time during summer and fall at the ARM SGP site. PBLHT-Lidar is derived as the median value among PBLHT-MPL, PBLHT-CEIL, and PBLHT-DL.
